# Supplementary material
Source: MDPI journal article supplement (https://www.mdpi.com/2071-1050/16/9/3733)
Supplement: s1 [file s1]

Archive with 2 entries (2 files):
- PRISMA_2020_abstract_checklist.pdf
- sustainability-2942367-supplementary.pdf
